# Supplementary material for: Bleaching and post-bleaching mortality of Acropora corals on a heat-susceptible reef in 2016
Source: PeerJ. 2019 Dec 5;7:e8138. doi: 10.7717/peerj.8138 (PMC6899343; doi:10.7717/peerj.8138)
Supplement: File S2 [file peerj-07-8138-s003.xlsx]

## Sheet: %AliveAgem
Acropora gemmifera							Valunes are pixels afterward to ecalculate % alive.
	Size in April, 2016					2016-09-03				Septebmer 11, 2016			Septebmer 30, 2016			2016-10-10			2016-11-08			2017-02-04
No	Quadrat	NoOnMap	Area	Diam	Species	Status	TotalArea	Dead area	%Alive	TotalArea	Dead Area	%Alive	TotalArea	Dead Area	%Alive	TotalArea	Dead Area	%Alive	TotalArea	Dead Area	%Alive	WholeArea	DeadArea	%Alive	Status on February 4, 2017
1	147	1	43.17	7.41389	A. gemmifera	Bleached			100			100			0			0			0			0	Dead
2	147	2	13.641	4.16752	A. gemmifera	Bleached			75			0			0			0			0			0	Dead
3	147	13	28.905	6.06655	A. gemmifera	Bleached			100	59952	21285	64.4966			0			0			0			0	Dead
4	147	16	20.025	5.04942	A. gemmifera	Bleached			100			0			0			0			0			0	Dead
5	147	17	69.543	9.40983	A. gemmifera	Bleached			30			0			0			0			0			0	Dead
6	147	18	274.849	18.7069	A. gemmifera	Bleached			100			100			0			0			0			0	Dead
7	147	21	224.718	16.9151	A. gemmifera	Bleached			100			100			0			0			0			0	Dead
8	147	22	203.823	16.1095	A. gemmifera	Bleached			100			100			0			0			0			0	Dead
9	149	49	208.878	16.308	A. gemmifera	Bleached	121776	55593	54.3481	231860	107469	53.6492			0			0			0			0	Dead
10	149	51	55.816	8.43013	A. gemmifera	Bleached			100	202419	34811	82.8025			0			0			0			0	Dead
11	149	56	1069.48	36.9013	A. gemmifera	Bleached			100	1220592	56598	95.3631			0			0			0			0	Dead
12	149	58	214.563	16.5285	A. gemmifera	PartBleached			100			100			100			100			100			100	Norm
13	149	59	1055.41	36.6577	A. gemmifera	Bleached			100			100			100			100			100			100	Norm
14	148	60	571.359	26.9718	A. gemmifera	Bleached	445.178	31.403	92.946	703779	183864	73.8748	851622	702219	17.5433	776679	728683	6.17964	653588	29855	4.56786	899346	56383	6.26933	PartDead
15	148	61	114.9	12.0953	A. gemmifera	Bleached			100			100			100	147190	18582	87.3755	118925	35732	69.9542			0	Dead
16	148	66	351.209	21.1465	A. gemmifera	Bleached			100	598657	307944	48.5609	774582	602785	22.1793			0			0			0	Dead
17	148	66.1	21.801	5.26858	A. gemmifera	Bleached			100			100			100			0			0			0	Dead
18	148	69	289.463	19.1978	A. gemmifera	Bleached	661618	330991	49.9725	765830	718383	6.1955			0			0			0			0	Dead
19	148	70	526.403	25.8889	A. gemmifera	Bleached	1133718	799918	29.4429	972462	864862	11.0647			0			0			0			0	Dead
20	148	77	479.507	24.7089	A. gemmifera	Bleached			100			100	807892	431143	46.6336	228523	152727	33.1678			0			0	Dead
21	148	78	159.665	14.258	A. gemmifera	Bleached			100			100			100			100			100			100	Norm
22	148	79	311.498	19.9151	A. gemmifera	Bleached	602699	75217	87.52	201751	54290	73.0906	577252	424612	26.4425	151467	128643	15.0686			0			0	Dead
23	148	80	67.018	9.23742	A. gemmifera	Bleached			100			0			0			0			0			0	Dead
24	148	82	220.326	16.749	A. gemmifera	Bleached	546602	31674	94.2053	161286	11493	92.8741	401019	42812	89.3242	691391	99361	85.6288	584678	27415	4.68891			0	Dead
25	148	85	92.647	10.861	A. gemmifera	Bleached			100			100			100			100			100			100	Norm
26	148	87	352.545	21.1867	A. gemmifera	Bleached			100			100	603107	175475	70.9048	674731	291896	56.7389	856306	68250	7.97028			0	Dead
27	148	91	30.191	6.20003	A. gemmifera	Bleached			50	67614	38733	42.7145			0			0			0			0	Dead
28	148	94	131.699	12.9493	A. gemmifera	Bleached			100			100			100			100	234192	63559	72.8603	202742	85276	42.0613	PartDead
29	148	95	612.519	27.9264	A. gemmifera	Bleached	1698985	351756	79.2961	554893	313963	43.4192	1265185	912481	27.8777	770496	627912	18.5055			0			0	Dead
30	148	99	279.697	18.8712	A. gemmifera	Bleached			15			0			0			0			0			0	Dead
31	148	100	126.088	12.6704	A. gemmifera	Bleached			90			0			0			0			0			0	Dead
32	148	101	521.401	25.7656	A. gemmifera	Bleached	921153	415526	54.8907	353780	274083	22.5273	1110638	961589	13.4201	725810	657493	9.41252			0			0	Dead
33	150	102	160.157	14.28	A. gemmifera	Bleached			100			100			100	225483	65458	70.9699			25	313091	65833	21.0268	Dead
34	150	104	840.865	32.7204	A. gemmifera	Bleached			100			100	1094508	788268	27.9797	408303	337978	17.2237			0			0	Dead
35	150	109	229.168	17.0817	A. gemmifera	Bleached			100			100	506428	34319	93.2233	447225	153759	65.6193	520892	498241	4.3485			0	Dead
36	150	117	48.157	7.83041	A. gemmifera	Bleached			100			100			100			100			100			100	Norm
37	150	135	43.203	7.41672	A. gemmifera	Bleached			100			100			100			100	64731	12759	80.2892	72954	29769	59.1948	PartDead
38	150	136	185.122	15.3527	A. gemmifera	Bleached			100			100			0			0			0			0	Dead
39	150	137	78.96	10.0267	A. gemmifera	Bleached			100			100			100			100			100			100	Norm
40	150	139	479.92	24.7195	A. gemmifera	Bleached			100			100	568188	370194	34.8466	598053	513449	14.1466	632354	584068	7.63591	523509	9717	1.85613	PartDead
